# Supplementary material
Source: Springer Nature journal article supplement (https://www.springermedizin.de/resource/supplementary/12889_2010_2450_MOESM3_ESM.pdf/9485906)

### Ages 45 and over

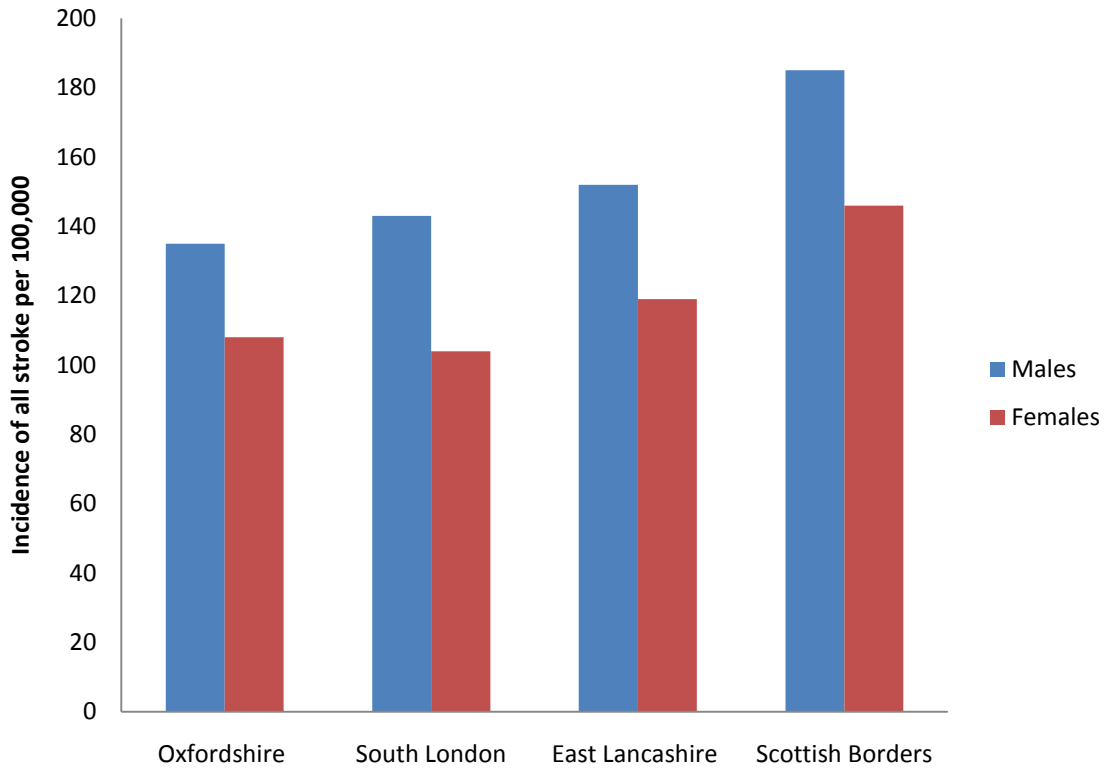

### Ages 45 to 74

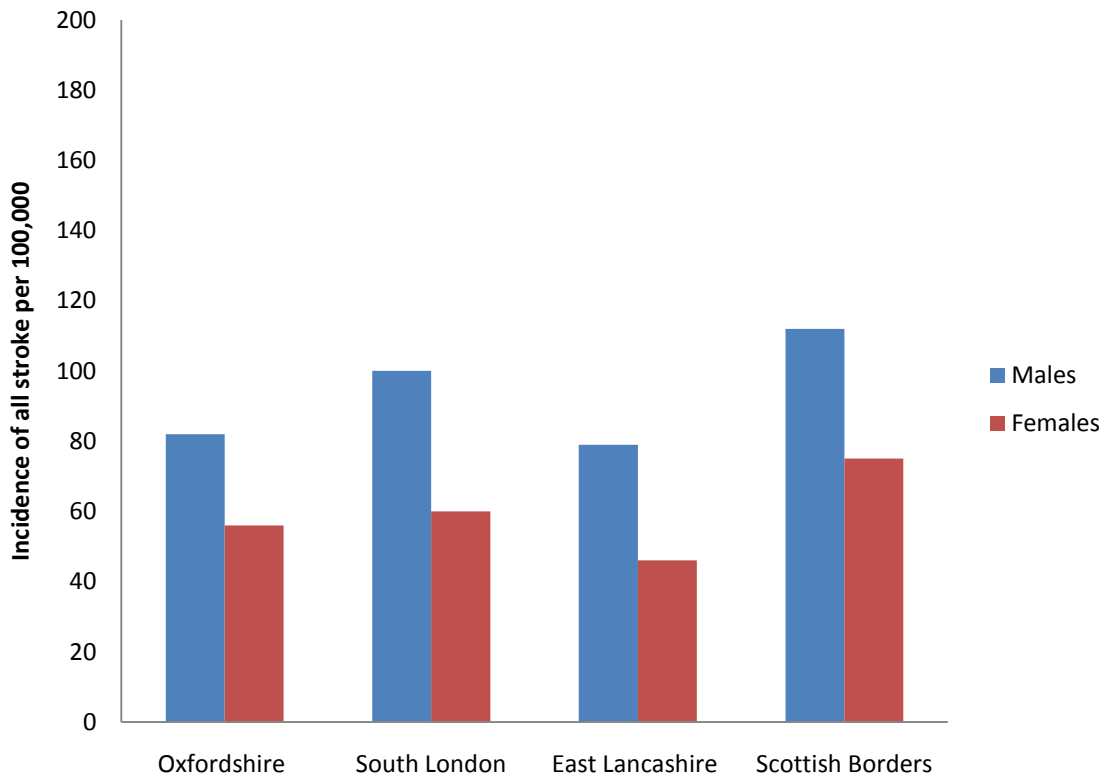

Supplement: MOESM3 [file 9485906]
